# Supplementary material for: Asymmetric bifunctional protein nanoparticles through redesign of self-assembly
Source: PubMed Central journal article supplement — Nanoscale Adv. 2019 Feb 21;1(5):1833–46. doi: 10.1039/c8na00375k (PMC9419478; doi:10.1039/c8na00375k), 2019-02-21
Supplement: NA-001-C8NA00375K-s001.pdf [file NA-001-C8NA00375K-s001.pdf]

### **Asymmetric bifunctional protein nanoparticles through redesign of self-assembly**

Santiago Sosa<sup>1,2</sup>, Andrés H. Rossi<sup>1</sup>, Alan M. Szalai<sup>2</sup>, Sebastián Klinke<sup>1,3</sup>, Jimena Rinaldi<sup>1</sup>, Ana, Farias<sup>1</sup>, Paula M. Berguer<sup>1</sup>, Alejandro D. Nadra<sup>4</sup>, Fernando D. Stefani<sup>2,5</sup>, Fernando A. Goldbaum<sup>1,3</sup>, Hernán R. Bonomi<sup>1,&,#</sup>

<sup>1</sup>Fundación Instituto Leloir, IIBBA-CONICET, Av. Patricias Argentinas 435, (C1405BWE) Ciudad Autónoma de Buenos Aires, Argentina.

<sup>2</sup>Centro de Investigaciones en Bionanociencias (CIBION)-CONICET, Godoy Cruz 2390 (C1425FQD), Ciudad Autónoma de Buenos Aires, Argentina.

<sup>3</sup>Plataforma Argentina de Biología Estructural y Metabólica PLABEM, Av. Patricias Argentinas 435 (C1405BWE) Ciudad Autónoma de Buenos Aires, Argentina.

<sup>4</sup>Departamento de Fisiología, Biología Molecular y Celular, Departamento de Química Biológica and IQUIBICEN-CONICET, Facultad de Ciencias Exactas y Naturales, Universidad de Buenos Aires, Ciudad Universitaria, Pabellón 2 (C1428EHA), Ciudad Autónoma de Buenos Aires, Argentina.

<sup>5</sup>Departamento de Física, Facultad de Ciencias Exactas y Naturales, Universidad de Buenos Aires, Pabellón 1 Ciudad Universitaria (C1428EHA), Ciudad Autónoma de Buenos Aires, Argentina

<sup>&</sup>Current address: Centre de Biochimie Structurale, CNRS UMR5048, INSERM U1054, Université de Montpellier, 29 rue de Navacelles (34090), Montpellier, France.

<sup>#</sup>To whom correspondence should be addressed: [hbonomi@leloir.org.ar](mailto:hbonomi@leloir.org.ar)

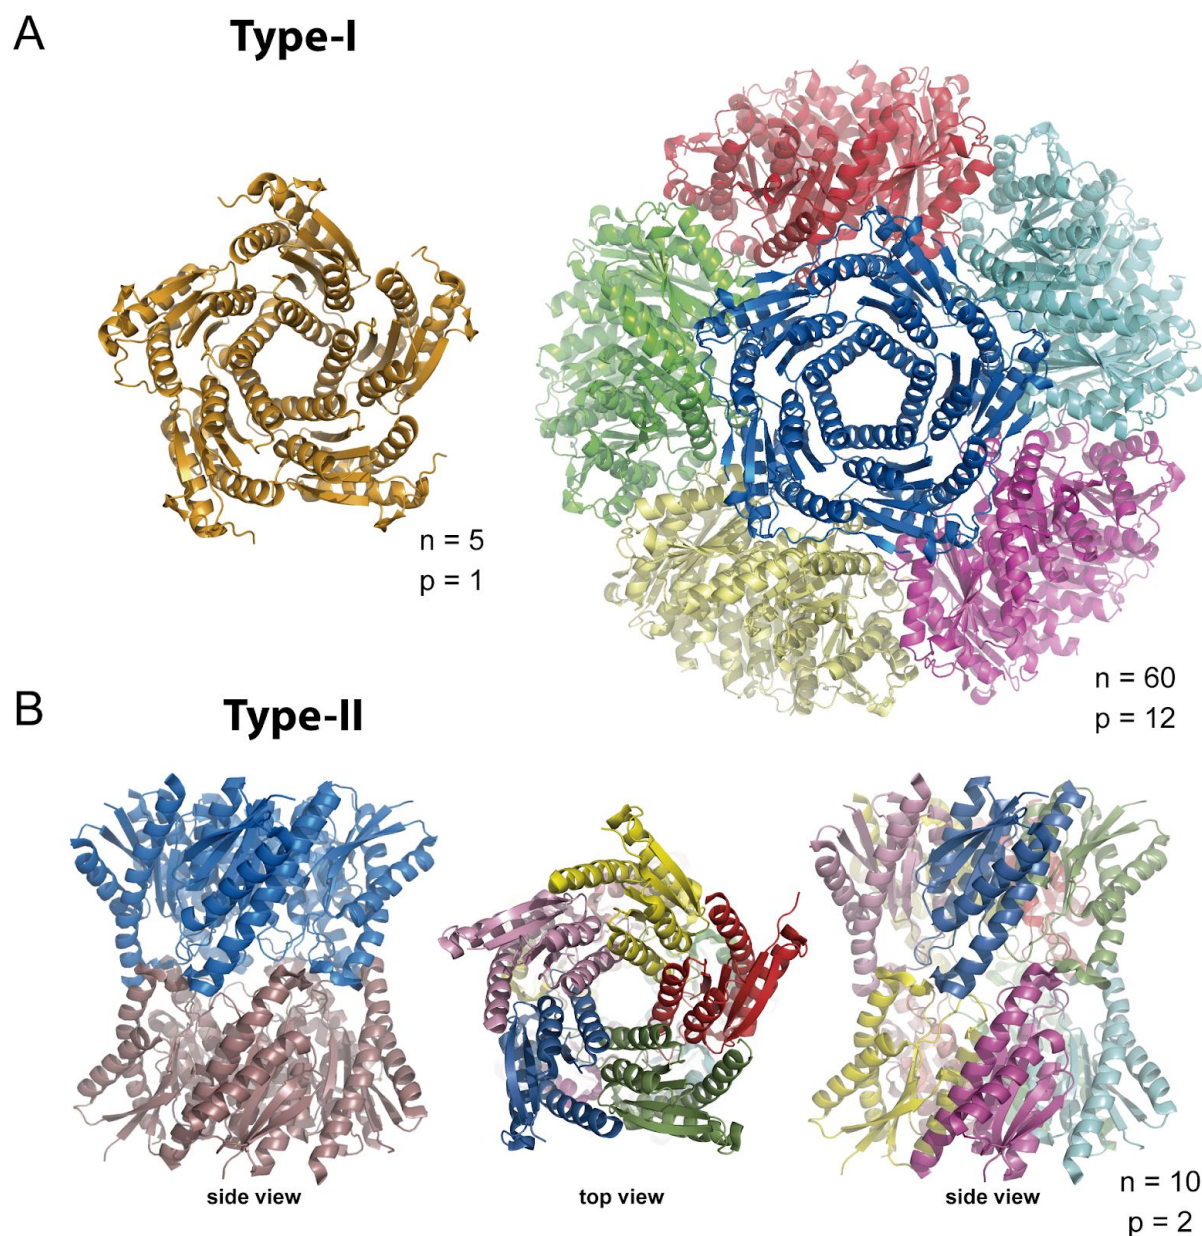

**Figure S1. Quaternary arrangements of Lumazine Synthases.**

Different examples of (A) Type-I and (B) Type-II LSs in cartoon representation. The number of monomers ( $n$ ) and the number of pentamers ( $p$ ) per particle are indicated. Pentamers are shown in different colors except when indicated. (A) Pentameric LS from *Schizosaccharomyces pombe* (PDB 1KYV)<sup>1</sup> and icosahedral LS from *Bacillus subtilis* (PDB 1RVV)<sup>2</sup>. (B) Decameric LS from *Brucella abortus* (PDB 1XN1)<sup>3</sup>. Center and right panels: monomers are shown in different colors.

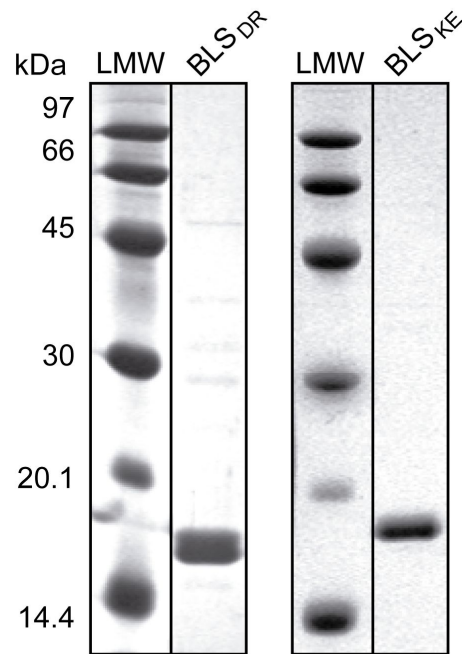

**Figure S2. Purity evaluation of BLS<sub>DR</sub> and BLS<sub>KE</sub> proteins.**

Protein preparations were analyzed by SDS-PAGE and stained with Coomassie blue after the size exclusion chromatography purification step.

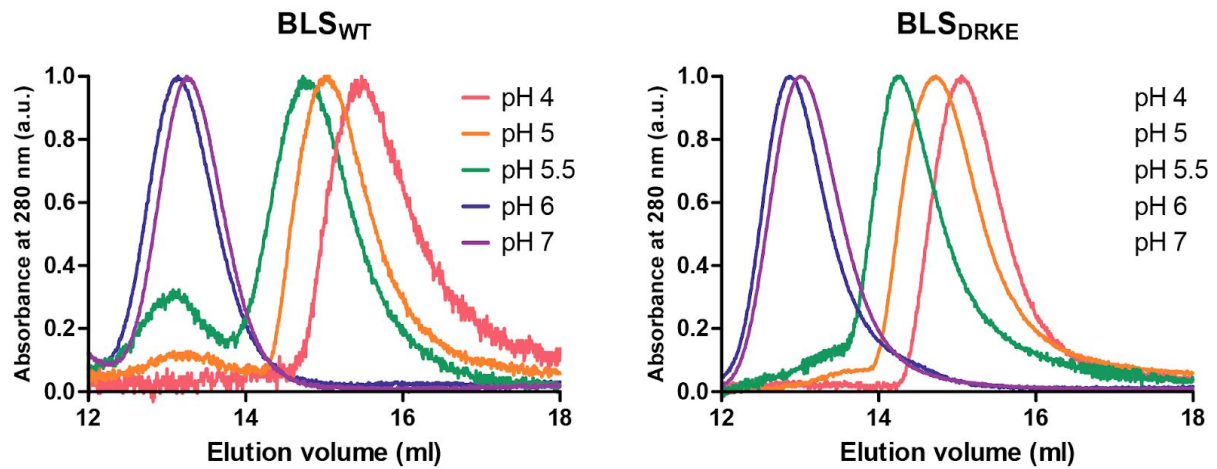

**Figure S3. Pentamer-pentamer interaction dependence on the pH value.**

BLS<sub>WT</sub> and BLS<sub>DRKE</sub> decamer dissociation curves at pH 4-7. The data presented correspond to SEC-SLS measurements at each pH value. The MW was calculated for each peak and pentamer:decamer proportions estimated at each pH value for both proteins used in **Figure 4D** using a two-gaussian fitting.

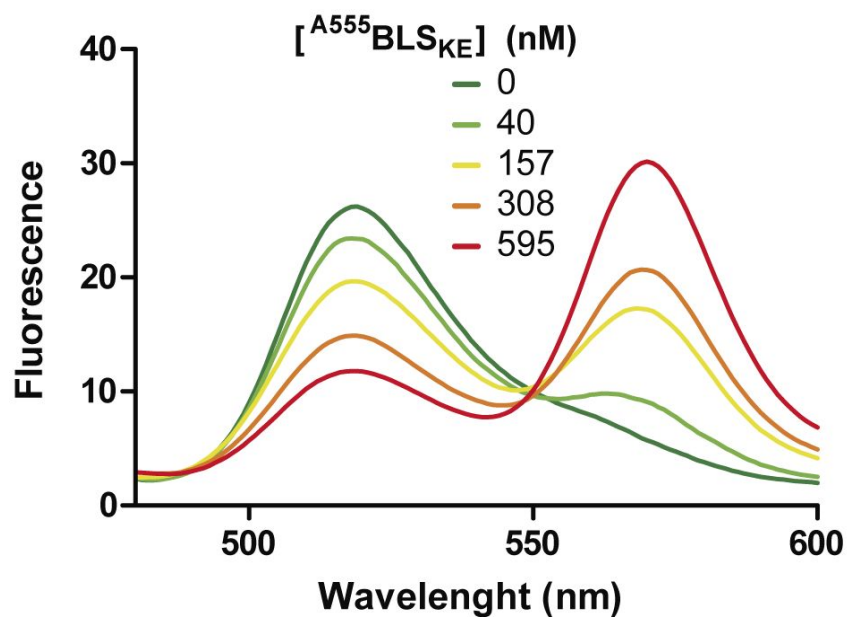

**Figure S4. FRET effect between fluorescent  $\text{BLS}_{\text{DR}}$  and  $\text{BLS}_{\text{KE}}$  pentamers.**

Fluorescence spectra ( $\lambda_{\text{exc}}$ : 470 nm) of 15 nM  $^{A488}\text{BLS}_{\text{DR}}$  incubated with increasing  $^{A555}\text{BLS}_{\text{KE}}$  concentrations.

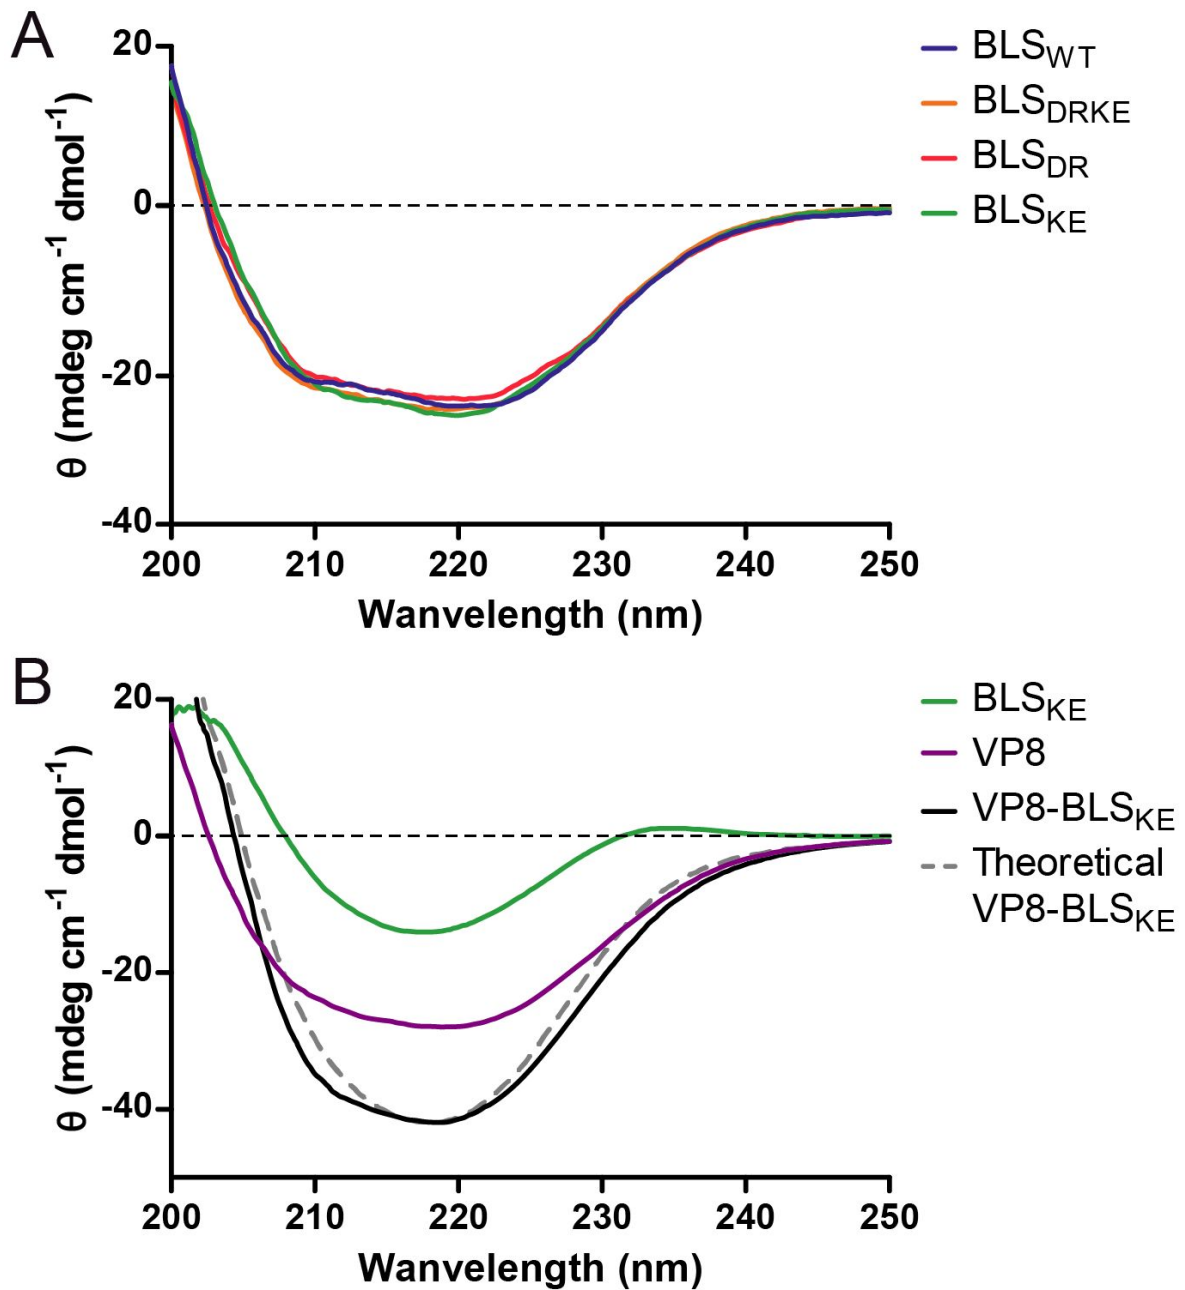

**Figure S5. Far-UV circular dichroism of BLS decameric and pentameric versions.**

Mean ellipticity spectra of A) BLS<sub>WT</sub>, BLS<sub>DR</sub>, BLS<sub>KE</sub> and BLS<sub>DRKE</sub>, and B) BLS<sub>KE</sub>, VP8 and VP8-BLS<sub>KE</sub>, measured at 25 °C, pH 7.8. The theoretical VP8-BLS<sub>KE</sub> spectrum was calculated as the sum of VP8 and BLS<sub>KE</sub> spectra.

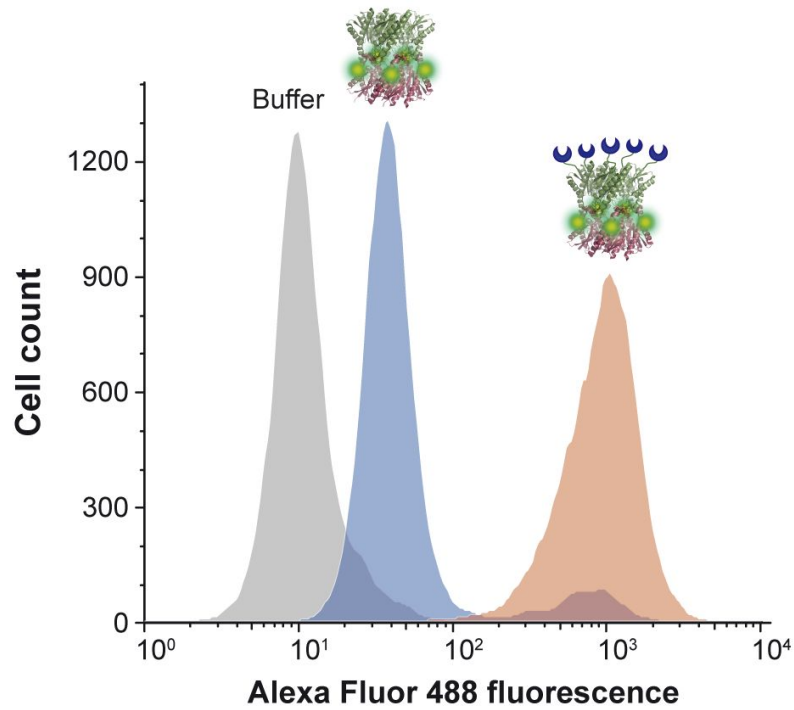

**Figure S6. Flow cytometry of non-adherent cells labeled with a bifunctionalized  $BLS_{DRKE}$ .**

Flow cytometry fluorescence histograms of NS0 murine cells incubated with PBS buffer (grey) and  $A^{488}BLS_{DR}$  with  $BLS_{KE}$  (blue) or VP8- $BLS_{KE}$  (orange), both proteins at 50 mg/ml.



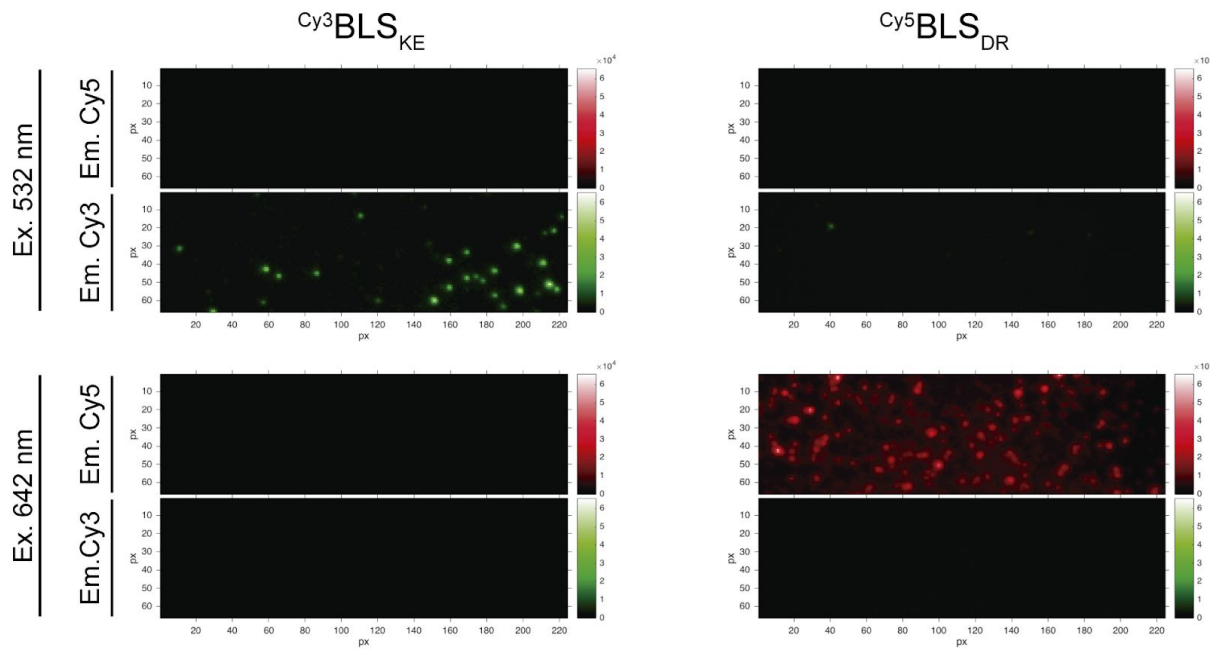

**Figure S7. Wide-field two-color epifluorescence TIRF microscopy of  $\text{Cy}^5\text{BLS}_{\text{KE}}$  and  $\text{Cy}^3\text{BLS}_{\text{DR}}$  particles.** Between 100 and 500 cumulative images were acquired using emission filters for Cy3 and Cy5. Pixel values were relativized to the maximum value for each emission channel, subtracting their respective minimum values, rescaled to [0-65535], and represented by the colormap scales.



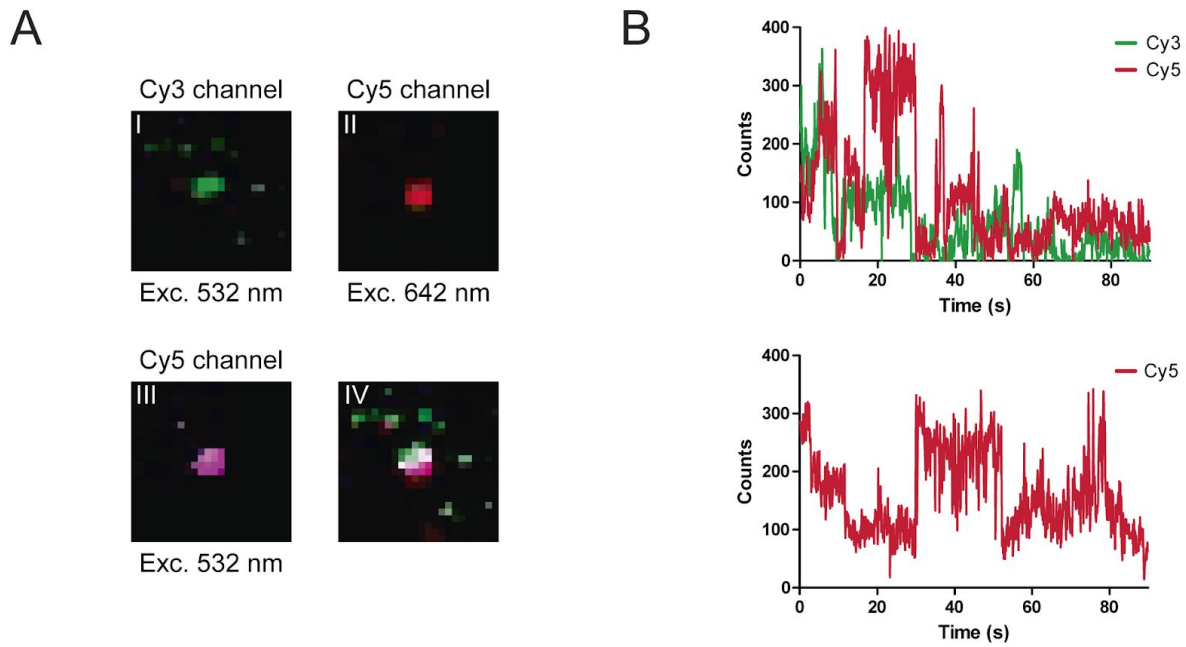

**Figure S8. Example of smFRET of co-localizing  $\text{Cy}^5\text{BLS}_{\text{KE}}$  and  $\text{Cy}^3\text{BLS}_{\text{DR}}$  particles.**

(A) Images derived from TIRF microscopy of pre-incubated  $\text{Cy}^5\text{BLS}_{\text{KE}}$  and  $\text{Cy}^3\text{BLS}_{\text{DR}}$ . Excitation lasers: 532 nm (panels I and III) and 642 nm (panel II); emission filters: Cy3 (panel I) and Cy5 (panels II and III). Panel IV is a merge of images from panels I and II. Each image represents a 90-s acquisition interval. (B) 90-s fluorescence time traces derived from the spot shown in (A). Top panel: Cy3 and Cy5 channels excited with a 532 nm laser. Bottom panel: Cy5 channel excited with a 642 nm laser.

**Table S1. Primers and plasmids used in this study.**

| Primer                 | Sequence (5'-3')                                              | Characteristics / mutation                                                                                    | References   |
|------------------------|---------------------------------------------------------------|---------------------------------------------------------------------------------------------------------------|--------------|
| BLS_C5S_F              | caaagctctccgaacaagacat                                        | C5S                                                                                                           | This work    |
| BLS_C5S_R              | tgttcggagagctttggttcaa                                        | C5S                                                                                                           | This work    |
| BLS_DD_F               | gtcgtgctgacgccggacgacttccatgaaagcaag                          | H117D/H118D                                                                                                   | This work    |
| BLS_DD_R               | cttgctttcatggaagtcgtccggcgtcagcacgac                          | H117D/H118D                                                                                                   | This work    |
| BLS_RR_F               | agcaaggagcatcaccgcttcttccatgcatttcaaggtgaag                   | D127R/A131R                                                                                                   | This work    |
| BLS_RR_R               | cttcaccttgaaatggcgtggaagaagcggatgatgctccttgct                 | D127R/A131R                                                                                                   | This work    |
| BLS_KK_F               | gtcgtgctgacgccgaagaagttccatgaaagcaag                          | H117K/H118K                                                                                                   | This work    |
| BLS_KK_R               | cttgctttcatggaacttcttccgctcagcacgac                           | H117K/H118K                                                                                                   | This work    |
| BLS_EE_F               | agcaaggagcatcacgaattcttccatgaacatttcaaggtgaag                 | D127E/A131E                                                                                                   | This work    |
| BLS_EE_R               | cttcaccttgaaatgttcatggaagaattcgtgatgctccttgct                 | D127E/A131E                                                                                                   | This work    |
| BLS_DR-K123C_F         | gacgaacttccatgaaagctgtgagcatcaccgcttc                         | K123C                                                                                                         | This work    |
| BLS_DR-K123C_R         | gaagcggatgatgctcacagcttccatggaagtcgctc                        | K123C                                                                                                         | This work    |
| BLS_KE-K123C_F         | aagaagttccatgaaagctgtgagcatcacgaattc                          | K123C                                                                                                         | This work    |
| BLS_KE-K123C_R         | gaattcgtgatgctcacagcttccatggaacttctt                          | K123C                                                                                                         | This work    |
| VP8-BLS_F              | ttgtttaactttaagaaggagatatacatatgcatgaaccagtgtgatggaccatc      | pET11a-VP8d sequences. NdeI restriction site: <u>catatg</u> .                                                 | This work    |
| VP8-BLS_R              | aaggatgtcttaagaccgctaccgctaccctaatccattattatgtattcagtcattttgc | AflI restriction site: <u>cttaag</u> . Designed to anneal at BLS residue number 5                             | This work    |
| Plasmid                | Template derived from / Primers used                          | Characteristics / mutations                                                                                   | References   |
| pBLS <sub>WT</sub>     | pET11a-BLS                                                    | BLS with wild-type interface. Contains C5S mutation to avoid the use of reducing agents to impair aggregation | This work    |
| pBLS <sub>D</sub>      | pBLS <sub>WT</sub> / BLS_DD_F-BLS_DD_R                        | H117D/H118D                                                                                                   | This work    |
| pBLS <sub>DR</sub>     | pBLS <sub>D</sub> / BLS_RR_F-BLS_RR_R                         | H117D/H118D/D127R/A131R                                                                                       | This work    |
| pBLS <sub>K</sub>      | pBLS <sub>WT</sub> / BLS_KK_F-BLS_KK_R                        | H117K/H118K                                                                                                   | This work    |
| pBLS <sub>KE</sub>     | pBLS <sub>K</sub> / BLS_EE_F-BLS_EE_R                         | H117K/H118K/D127E/A131E                                                                                       | This work    |
| pBLS <sub>DR-C</sub>   | pBLS <sub>DR</sub> / BLS_DR-K123C_F-BLS_DR-K123C_R            | H117D/H118D/D127R/A131R/K123C                                                                                 | This work    |
| pBLS <sub>KE-C</sub>   | pBLS <sub>KE</sub> / BLS_KE-K123C_F-BLS_KE-K123C_R            | H117K/H118K/D127E/A131E/K123C                                                                                 | This work    |
| pVP8-BLS               | pET11a-BLS                                                    | N-terminal VP8d GSGSG-BLS                                                                                     | <sup>1</sup> |
| pVP8-BLS <sub>KE</sub> | pBLS <sub>KE</sub> / VP8-BLS_F-VP8-BLS_R                      | N-terminal VP8d GSGSG-BLS <sub>KE</sub>                                                                       | This work    |

**Table S2. Gibbs free energy between pentamers for BLS variants calculated with FoldX.**

| <b>BLS variant</b> | <b><math>\Delta G_{pp}</math> (kCal/mol)</b> | <b>Relative <math>\Delta G_{pp}</math></b> |
|--------------------|----------------------------------------------|--------------------------------------------|
| BLS <sub>WT</sub>  | -23,35 $\pm$ 1,60                            | 1,00 $\pm$ 0,14                            |
| D81A               | -16,36 $\pm$ 0,57                            | 0,70 $\pm$ 0,10                            |
| I84A               | -17,98 $\pm$ 0,88                            | 0,77 $\pm$ 0,12                            |
| H117A              | -23,13 $\pm$ 0,44                            | 0,99 $\pm$ 0,09                            |
| H118A              | -20,94 $\pm$ 0,72                            | 0,90 $\pm$ 0,10                            |
| H117A+H118A        | -13,38 $\pm$ 0,81                            | 0,57 $\pm$ 0,13                            |
| H120A              | -27,45 $\pm$ 1,95                            | 1,18 $\pm$ 0,13                            |
| E124A              | -16,44 $\pm$ 0,43                            | 0,70 $\pm$ 0,09                            |
| H125A              | -18,68 $\pm$ 0,79                            | 0,80 $\pm$ 0,11                            |
| F128A              | -9,88 $\pm$ 0,50                             | 0,42 $\pm$ 0,12                            |
| H132A              | -14,33 $\pm$ 0,23                            | 0,61 $\pm$ 0,08                            |
| E124A+H132A        | -14,08 $\pm$ 0,39                            | 0,60 $\pm$ 0,10                            |
| E124A+F128A+H132A  | -2,32 $\pm$ 0,25                             | 0,10 $\pm$ 0,18                            |

**BLS protein sequences.**

Mutations are colored in blue, red, yellow and green. VP8 is highlighted in light grey and the linker region in dark grey.

>BLS-WT (C5S)

MNQSSPNKTSFKIAFIQARWHADIVDEARKSFVAELAAKTGGSVEVEIFDVPGAYEIPLHAKTLART  
 GRYAAIVGAAFVIDGGIYRHDFVATAVINGMMQVQLETEVPVLSVVLTPHHFHESKEHHDFHAFHK  
 VKGVEAAHAALQIVSERSRIAALV

>BLS-DR

MNQSSPNKTSFKIAFIQARWHADIVDEARKSFVAELAAKTGGSVEVEIFDVPGAYEIPLHAKTLART  
 GRYAAIVGAAFVIDGGIYRHDFVATAVINGMMQVQLETEVPVLSVVLTPDDFHESKEHHRFFHRHFK  
 VKGVEAAHAALQIVSERSRIAALV

>BLS-KE

MNQSSPNKTSFKIAFIQARWHADIVDEARKSFVAELAAKTGGSVEVEIFDVPGAYEIPLHAKTLART  
 GRYAAIVGAAFVIDGGIYRHDFVATAVINGMMQVQLETEVPVLSVVLTPKKFHESKEHHEFFHEHFK  
 VKGVEAAHAALQIVSERSRIAALV

>VP8-BLS-KE

MHEPVLDGPYQPTTFNPPVSYWMLLAPTNAAGVVAEGTNNTNRWLATILIEPNVQQVERTYTLFGQQ  
 VQVTVSNDSQTKWKFDLQKQTDGNYSQHGPLLSTPKLYGVMKHGGRIYTYNGETPNATTGYYST  
 TNFDTVNMTAYCDFYIIPLAQEAKCTEYINNGLGSGSGLKTSFKIAFIQARWHADIVDEARKSFVA  
 ELAAKTGGSVEVEIFDVPGAYEIPLHAKTLARTGRYAAIVGAAFVIDGGIYRHDFVATAVINGMMQ  
 VQLETEVPVLSVVLTPKKFHESKEHHEFFHEHFKVKGVEAAHAALQIVSERSRIAALV

>BLS-DR-K123C

MNQSSPNKTSFKIAFIQARWHADIVDEARKSFVAELAAKTGGSVEVEIFDVPGAYEIPLHAKTLART  
 GRYAAIVGAAFVIDGGIYRHDFVATAVINGMMQVQLETEVPVLSVVLTPDDFHESCEHHRFFHRHFK  
 VKGVEAAHAALQIVSERSRIAALV

>BLS-KE-K123C

MNQSSPNKTSFKIAFIQARWHADIVDEARKSFVAELAAKTGGSVEVEIFDVPGAYEIPLHAKTLART  
 GRYAAIVGAAFVIDGGIYRHDFVATAVINGMMQVQLETEVPVLSVVLTPKKFHESCEHHEFFHEHFK  
 VKGVEAAHAALQIVSERSRIAALV

**Supplementary References**

- 1 D. Bellido, P. O. Craig, M. V. Mozgovoj, D. D. Gonzalez, A. Wigdorovitz, F. A. Goldbaum and M. J. Dus Santos, *Vaccine*, 2009, **27**, 136–145.
